# Supplementary material for: Uncovering the Impact of Urban Functional Zones on Air Quality in China
Source: Copernicus journal article supplement (doi:10.5194/egusphere-2024-3350), 2024-12-16
Supplement: Supplementary file [file egusphere-2024-3350-AC4-supplement.pdf]

Dear Editor and Reviewers,

Thank you for your comments concerning our manuscript entitled “Uncovering the Impact of Urban Functional Zones on Air Quality in China”. Those comments are all valuable and very helpful for revising and improving our paper, as well as the important guiding significance to our researches. We have studied comments carefully and have made correction which we hope meet with approval. Revisions are indicated within the text using track changes. **All of the responses have been addressed in blue and revisions have been addressed in red as following file of response letter**, and page numbers and line numbers in the response are based on the clean version. In the following, we include a point-by-point response to the comments.

Thank you and best regards.

Yours sincerely,

Wenchao HAN & Yang WANG

## Responses to CC

**Comment:** In this study, the concentration of air pollutants in different urban functional areas was counted by means of cartographic classification criteria. This novel idea is of great significance to the study of urban air pollution. In the future, the author can consider carrying out specific case studies for typical cities and expanding management experience.

### Response:

Thank you very much for your valuable suggestion. We fully agree that specific case studies for typical cities and expanding management experience are important directions for future research. In our subsequent work, we will actively consider conducting in-depth case analyses on representative cities to gain more practical insights.

We have added a discussion of the limitations in the last paragraph of the conclusion in **Lines 598-599**. “Additionally, we plan to actively undertake in-depth case studies on representative cities to provide enhanced guidance for urban planning and management.”
